# Supplementary material for: Molecular sieve films: New synthesis methods for improving the performance of zeolite ZSM-5 membranes
Source: Royal Society of Chemistry journal article supplement (doi:10.1039/d4nr01750a), 2003-01-01
Supplement: d4nr01750a1.pdf [file d4nr01750a1.pdf]

## Supplementary Material

### **Porous hybrid encapsulation enables the high-rate lithium storage for micron-sized SiO anode**

Xiaoyi Chen, Guanxia Zhu,\* Xinlin Zhang, Dandan Luo, Zhongling Cheng, Haijiao Zhang\*

*Institute of Nanochemistry and Nanobiology, School of Environmental and Chemical Engineering,  
Shanghai University, Shanghai 200444, P. R. China*

\*Corresponding author

E-mail: [hjzhang128@shu.edu.cn](mailto:hjzhang128@shu.edu.cn); [zhuguanxia@shu.edu.cn](mailto:zhuguanxia@shu.edu.cn)

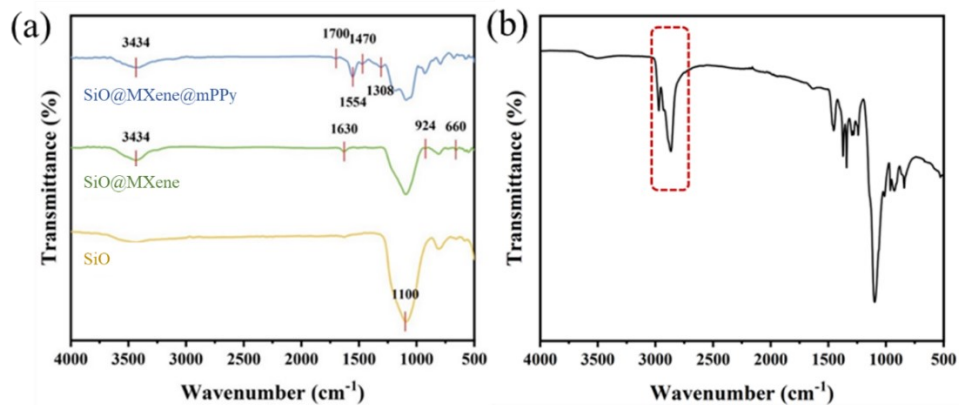

**Fig. S1** FT-IR spectra of (a) SiO, SiO@MXene, SiO@MXene@mPPy and (b) P123.

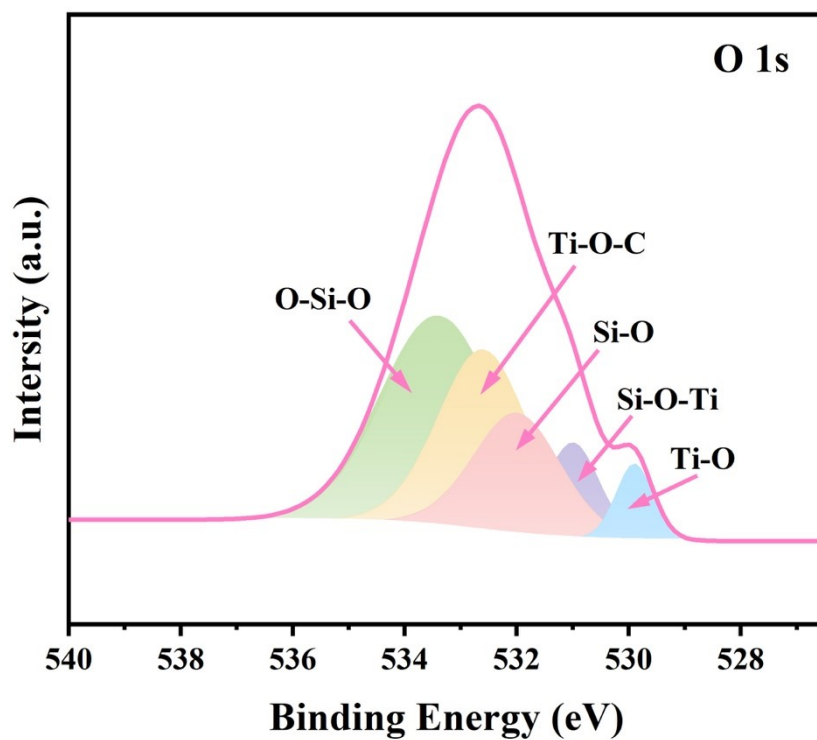

**Fig. S2** XPS spectrum of O 1s.

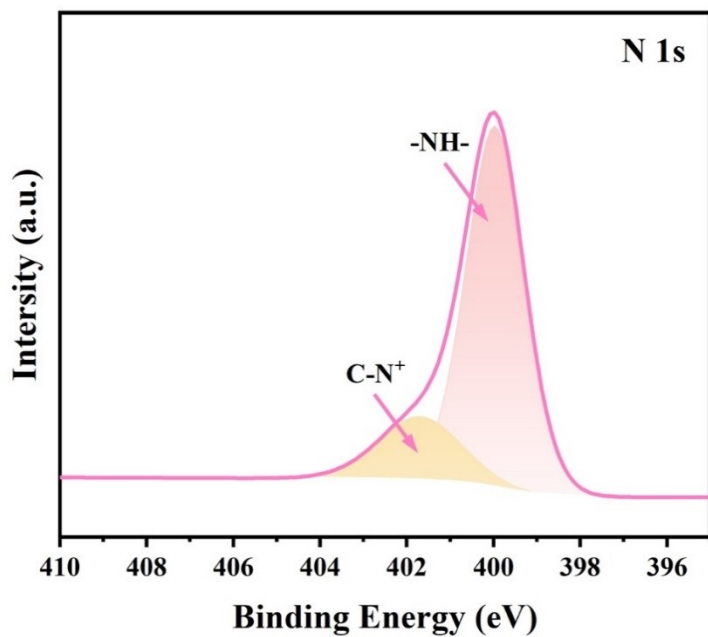

**Fig. S3** XPS spectrum of N 1s.

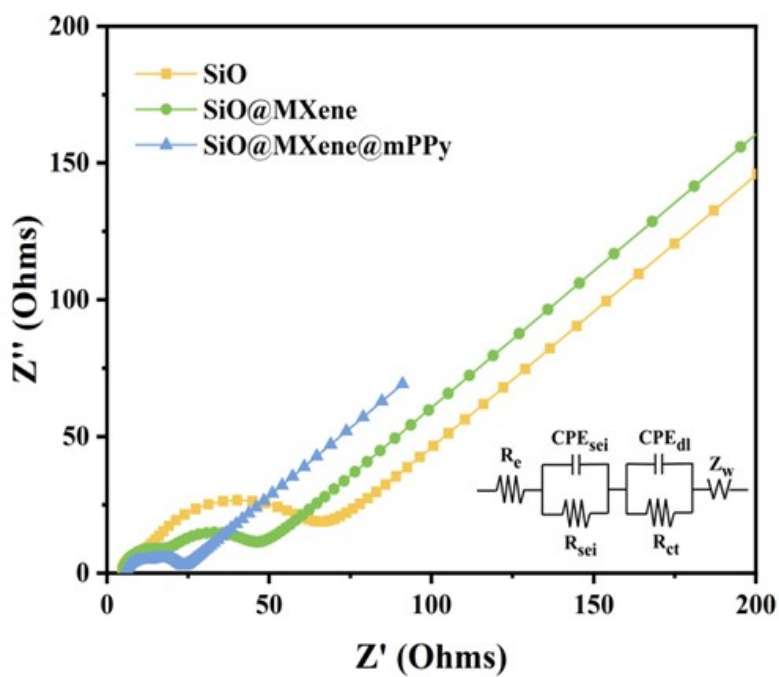

**Fig. S4** Electrochemical impedance spectra (EIS) of SiO, SiO@MXene and SiO@MXene@mPPy after cycling.

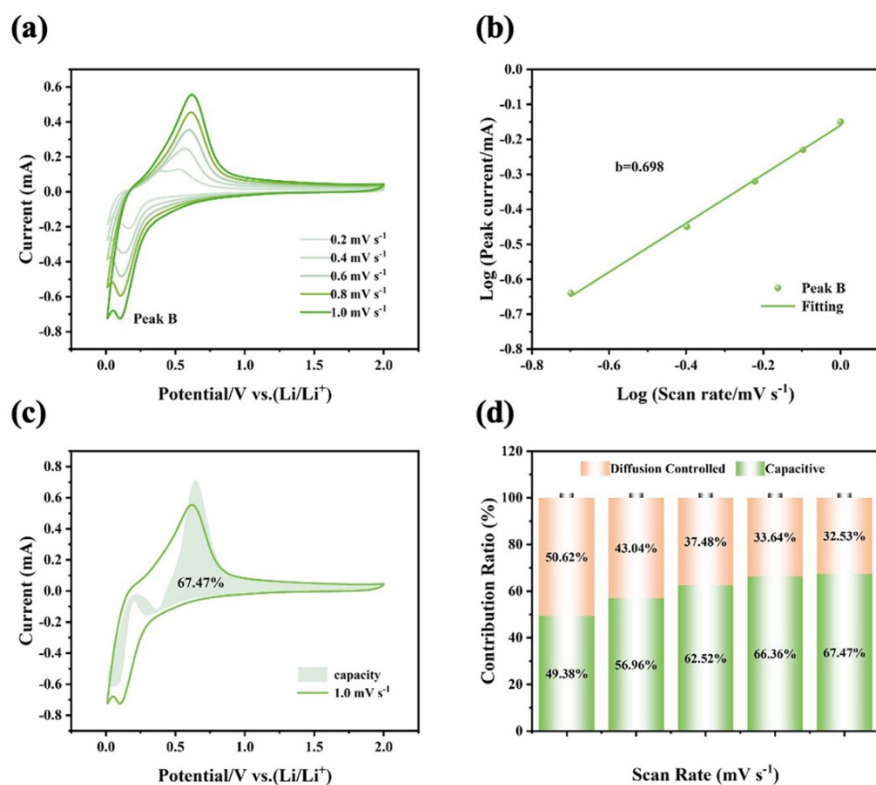

**Fig. S5** (a) CV curves of SiO@MXene at different scan rates from 0.1 to 1.0  $\text{mV s}^{-1}$ . (b) Correlation between the log(peak current) and the log(scan rate) of SiO@MXene. (c) Contribution of capacitive charge storage to the total capacity of the SiO@MXene electrode at a scan rate of 1.0  $\text{mV s}^{-1}$ . (d) Contribution ratio of the capacitive and diffusion-controlled charge storage at different scan rates of SiO@MXene electrode.

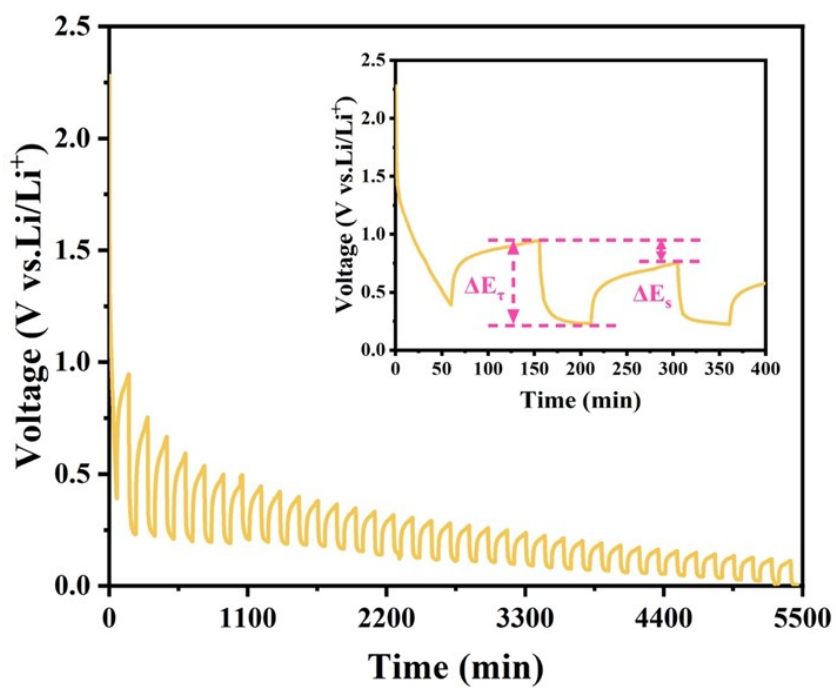

**Fig. S6** GITT curve of SiO@MXene electrode.

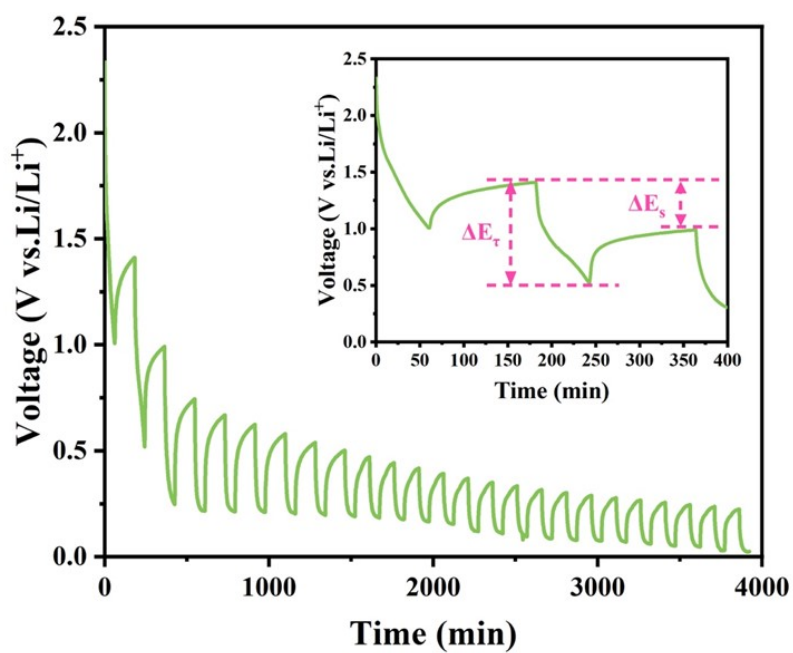

**Fig. S7** GITT curve of SiO electrode.
